# Supplementary material for: Posterior Lissencephaly Associated with Subcortical Band Heterotopia Due to a Variation in the CEP85L Gene: A Case Report and Refining of the Phenotypic Spectrum
Source: MDPI journal article supplement (doi:10.3390/genes12081208), 2021-08-05
Supplement: s1 [file s1]

**Figure S1** - Analysis of the *CEP85L* transcript in patient 1. (A) Graphical representation of *CEP85L* exons 1-3 (not drawn to scale); the position of the primers used on cDNA is indicated by red arrows. (B) cDNA amplification of exon 1-3 region in cDNA from two wild-type controls (proband's father, f, and mother, m) and the proband, p; nt=no-template control, mw=molecular weight marker (Gel Pilot 100 bp ladder, QIAGEN, Maryland, USA). The proband's lane presents both the expected 424 bp amplicon and a band at lower molecular weight. (C) Sequencing of the cDNA from the proband's low-weight band demonstrates the formation of a 1/3 exon junction.

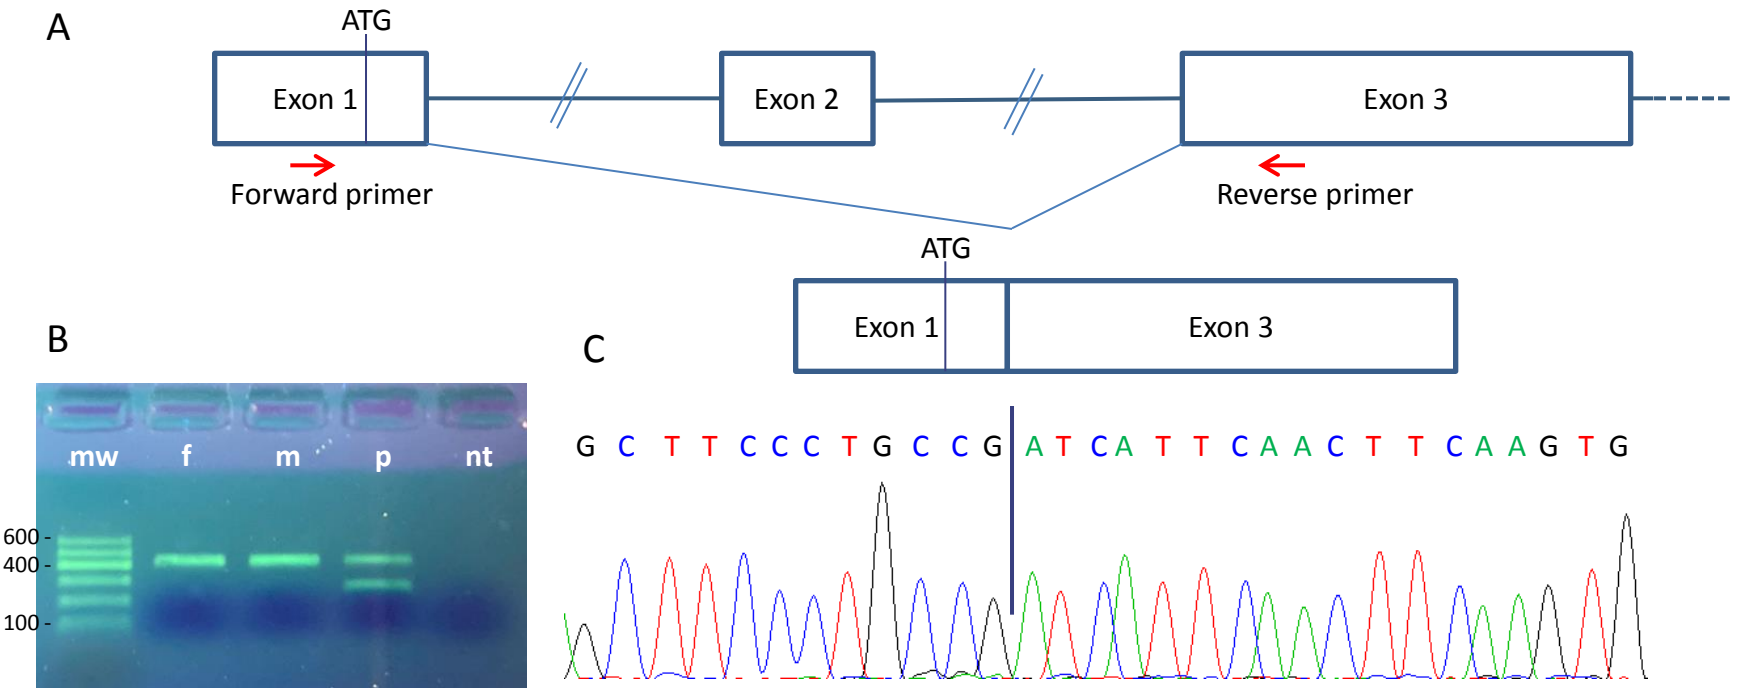

**Table S1** - Sequence (5' -> 3') of the primers used for analysis of the *CEP85L* cDNA (and  $\beta$ -actin control)

|                |                       |
|----------------|-----------------------|
| CEP85L_cDNA_1F | AAGAAGCAGGAGGACGGAC   |
| CEP85L_cDNA_1R | TGGTGTCAATGATTCCCTAAG |
| ACTB_F         | GCAAGAGATGGCCACGGCTG  |
| ACTB_R         | ATCCACACGGAGTACTTGCG  |

**Table S2.** List of the 182 genes associated with brain malformations analyzed through a targeted Next Generation Sequencing (NGS) custom panel.

|                 |                |                 |                 |                 |                 |                |
|-----------------|----------------|-----------------|-----------------|-----------------|-----------------|----------------|
| <i>ACTB</i>     | <i>CELSR2</i>  | <i>EIF4EBP1</i> | <i>KIF5C</i>    | <i>PAX6</i>     | <i>RPS6</i>     | <i>TMEM237</i> |
| <i>ACTG1</i>    | <i>CENPE</i>   | <i>EML1</i>     | <i>KIF7</i>     | <i>PCLO</i>     | <i>RPS6KB1</i>  | <i>TMEM67</i>  |
| <i>ADGRG1</i>   | <i>CENPJ</i>   | <i>EMX2</i>     | <i>KNL1</i>     | <i>PDE6D</i>    | <i>RPTOR</i>    | <i>TMTC3</i>   |
| <i>AHI1</i>     | <i>CEP135</i>  | <i>ERMARD</i>   | <i>LAMA2</i>    | <i>PHC1</i>     | <i>RTTN</i>     | <i>TSC1</i>    |
| <i>AKT1</i>     | <i>CEP152</i>  | <i>EXOSC3</i>   | <i>LAMB1</i>    | <i>PI4KA</i>    | <i>RXYLT1</i>   | <i>TSC2</i>    |
| <i>AKT1S1</i>   | <i>CEP290</i>  | <i>EXOSC8</i>   | <i>LAMC3</i>    | <i>PIK3CA</i>   | <i>SASS6</i>    | <i>TSEN15</i>  |
| <i>AKT3</i>     | <i>CEP41</i>   | <i>EZH2</i>     | <i>LARGE1</i>   | <i>PIK3R2</i>   | <i>SEPSECS</i>  | <i>TSEN2</i>   |
| <i>AMPD2</i>    | <i>CEP63</i>   | <i>FAT4</i>     | <i>MCPH1</i>    | <i>PLK4</i>     | <i>SHH</i>      | <i>TSEN34</i>  |
| <i>ANKLE2</i>   | <i>CHMP1A</i>  | <i>FIG4</i>     | <i>MFSD2A</i>   | <i>POGZ</i>     | <i>SIX3</i>     | <i>TSEN54</i>  |
| <i>ARFGEF2</i>  | <i>CIT</i>     | <i>FKRP</i>     | <i>MKS1</i>     | <i>POMGNT1</i>  | <i>SLC25A19</i> | <i>TUBA1A</i>  |
| <i>ARL13B</i>   | <i>CLP1</i>    | <i>FKTN</i>     | <i>MLST8</i>    | <i>POMGNT2</i>  | <i>SRGAP2</i>   | <i>TUBA8</i>   |
| <i>ARX</i>      | <i>CNTNAP2</i> | <i>FLNA</i>     | <i>MTOR</i>     | <i>POMT1</i>    | <i>STAMBP</i>   | <i>TUBB</i>    |
| <i>ASNS</i>     | <i>COL4A1</i>  | <i>FOXC1</i>    | <i>MYCN</i>     | <i>POMT2</i>    | <i>STIL</i>     | <i>TUBB2A</i>  |
| <i>ASPM</i>     | <i>COL4A2</i>  | <i>GLI2</i>     | <i>NDE1</i>     | <i>PPP1R15B</i> | <i>STRADA</i>   | <i>TUBB2B</i>  |
| <i>ATRX</i>     | <i>CRADD</i>   | <i>GMPPB</i>    | <i>NEDD4L</i>   | <i>PQBP1</i>    | <i>STX7</i>     | <i>TUBB3</i>   |
| <i>B3GALNT2</i> | <i>CSPP1</i>   | <i>GNAQ</i>     | <i>NFIX</i>     | <i>PTCH1</i>    | <i>TBC1D20</i>  | <i>TUBG1</i>   |
| <i>B4GAT1</i>   | <i>CTNNB1</i>  | <i>GPSM2</i>    | <i>NHEJ1</i>    | <i>RAB18</i>    | <i>TBC1D23</i>  | <i>TUBG2</i>   |
| <i>B9D1</i>     | <i>CUL4B</i>   | <i>IER3IP1</i>  | <i>NPHP1</i>    | <i>RAB3GAP1</i> | <i>TBC1D7</i>   | <i>VLDLR</i>   |
| <i>C5orf42</i>  | <i>DAG1</i>    | <i>INPPSE</i>   | <i>NPRL2</i>    | <i>RAB3GAP2</i> | <i>TBCD</i>     | <i>VPS53</i>   |
| <i>CC2D1A</i>   | <i>DCHS1</i>   | <i>ISPD</i>     | <i>NPRL3</i>    | <i>RALGAPA1</i> | <i>TCTN1</i>    | <i>VRK1</i>    |
| <i>CC2D2A</i>   | <i>DCX</i>     | <i>KANSL1</i>   | <i>NSD1</i>     | <i>RALGAPA2</i> | <i>TCTN2</i>    | <i>WDR62</i>   |
| <i>CCND2</i>    | <i>DEPDC5</i>  | <i>KAT6A</i>    | <i>OCLN</i>     | <i>RALGAPB</i>  | <i>TCTN3</i>    | <i>WDR81</i>   |
| <i>CDK5</i>     | <i>DEPTOR</i>  | <i>KATNB1</i>   | <i>OFD1</i>     | <i>RARS2</i>    | <i>TGIF1</i>    | <i>YWHAE</i>   |
| <i>CDK5RAP2</i> | <i>DNAI1</i>   | <i>KIAA0556</i> | <i>OPHN1</i>    | <i>RELN</i>     | <i>TMEM138</i>  | <i>ZIC1</i>    |
| <i>CDK6</i>     | <i>DYNC1H1</i> | <i>KIAA0586</i> | <i>ORC1</i>     | <i>RICTOR</i>   | <i>TMEM216</i>  | <i>ZNF335</i>  |
| <i>CDON</i>     | <i>EIF4E</i>   | <i>KIF11</i>    | <i>PAFAH1B1</i> | <i>RPGRIP1L</i> | <i>TMEM231</i>  | <i>ZNF423</i>  |

**Table S4** - *In silico* predictions on how the different variants at CEP85L exon 2 donor site affect the canonical 5' splice site

| <b>NM_001042475.3:</b> | <b>MaxEnt<br/>(score)</b> | <b>NNSPLICE<br/>(confidence)</b> | <b>NetGene2<br/>(confidence)</b> | <b>SPiCE<br/>(probability)</b> | <b>Patient #<sup>†</sup></b> |
|------------------------|---------------------------|----------------------------------|----------------------------------|--------------------------------|------------------------------|
| WT                     | 9.60                      | 0.89                             | 0.79                             | 0.02686                        |                              |
| c.232+1del             | -9.38                     | 0.00                             | 0.00                             | 1                              | 1                            |
| c.232+1G>T             | 1.09                      | 0.00                             | 0.00                             | 1                              | 10                           |
| c.232+3G>T             | 5.61                      | 0.46                             | 0.00                             | 0.89191                        | 11, 12                       |
| c.232+5G>T             | 4.41                      | 0.00                             | 0.00                             | 0.99519                        | 20, 21                       |
| c.232+5G>A             | 5.54                      | 0.00                             | 0.00                             | 0.98584                        | 13, 14                       |

<sup>†</sup>Case numbers refer to patients as presented in Table S3
